# Supplementary material
Source: PubMed Central journal article supplement (PMC3463841)
Supplement: emboj2012216s5.pdf [file emboj2012216s5.pdf]

## Source Data for Figure 7

Original scans for Figure 7B:

anti-H2B:

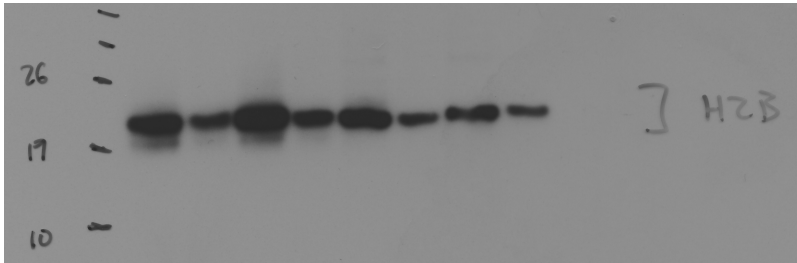

anti-actin:

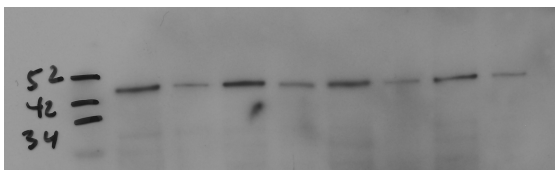

The above Western was re-probed for actin.
