# Supplementary material
Source: PubMed Central journal article supplement (PMC3463841)
Supplement: emboj2012216s6.pdf [file emboj2012216s6.pdf]

## Source Data for Figure S1

Original scans for Figure S1B:

anti-CSR-1:

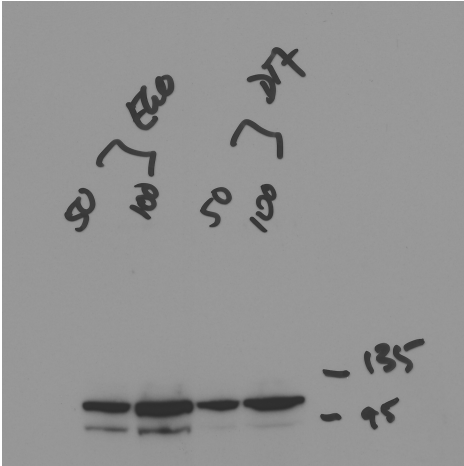

The bottom band is likely to be a degradation product and was not included.

Ponceau-stained membrane:

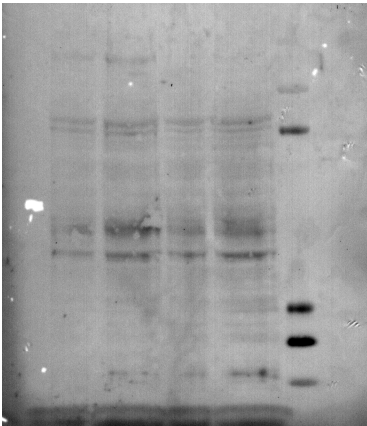

The relevant size region was shown in the Figure.
